# Supplementary material for: Elevated Carbon Monoxide in the Exhaled Breath of Mice during a Systemic Bacterial Infection
Source: PLOS journal article supplement (doi:10.1371/journal.pone.0069802), 2013-07-31

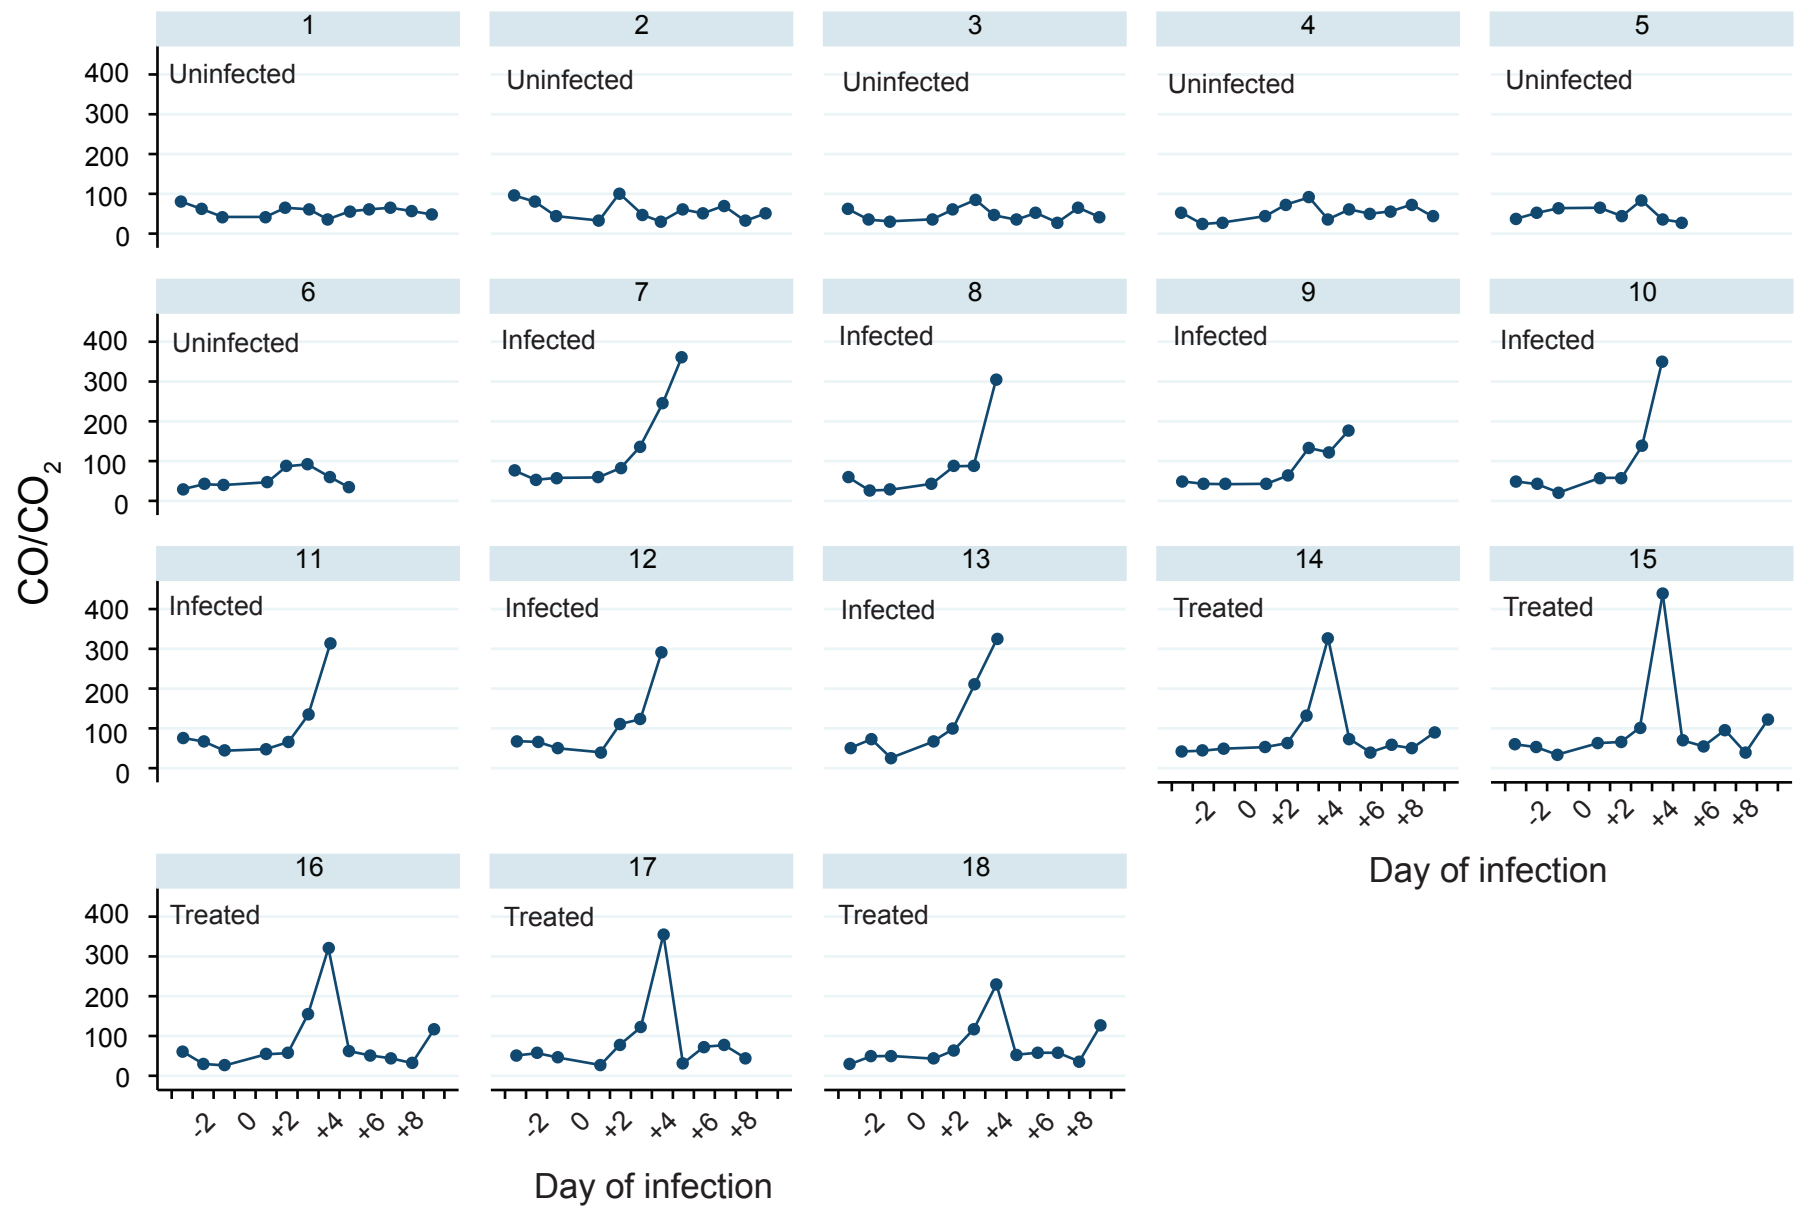

Supplement: S2 (10.1371/journal.pone.0069802.s002) [file journal.pone.0069802.s002]
